# Supplementary material for: Pru p 9, a new allergen eliciting respiratory symptoms in subjects sensitized to peach tree pollen
Source: PubMed Central journal article supplement (PMC7082028; doi:10.1371/journal.pone.0230010), 2020-03-19
Supplement: pone.0230010.s003.pdf [file pone.0230010.s003.pdf]

The immunoblotting signal was developed by the ECL-Western Blotting reagent, and detected in a luminescent imager analyzer LAS3000 after 10 min. Quantitation of the signal was performed using the computer program Multigauge V3.0.

CBS signal was obtained using Coomassie Blue Staining R-250.

Coomassie

IgE binding

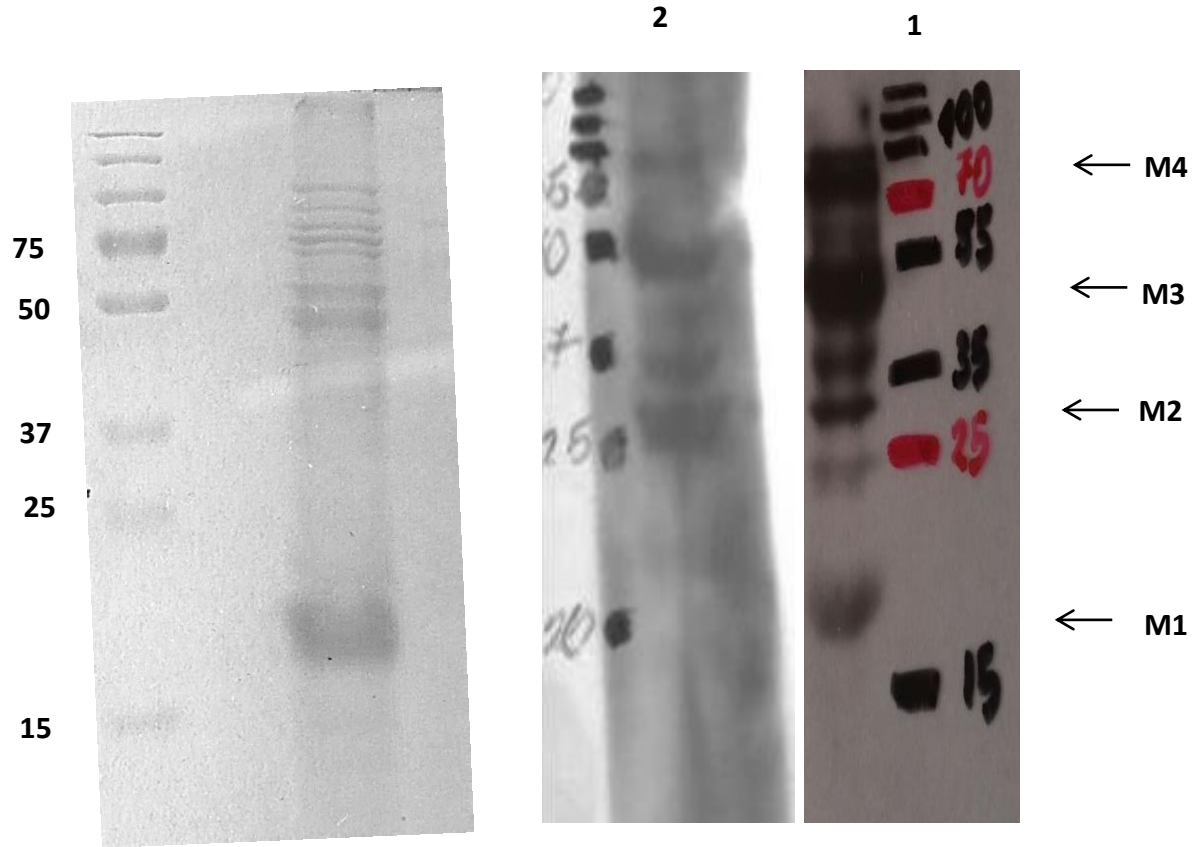

**Figure 1.**

1: peach tree pollen allergic subjects

2: pollen allergic subjects.

M1: Pathogenesis related protein 1A.

M2: glucan endo-1,3-beta-glucosidase-like.

M3: Polygalacturonase.

M4: UTP-glucose-1-phosphate uridylyltransferase.

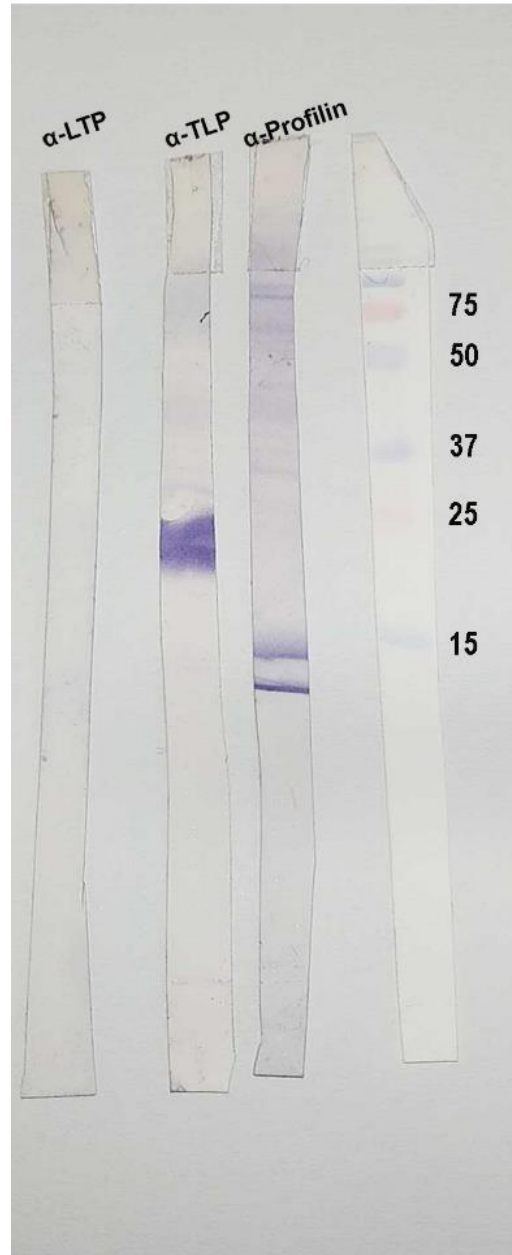

**Figure 2.**

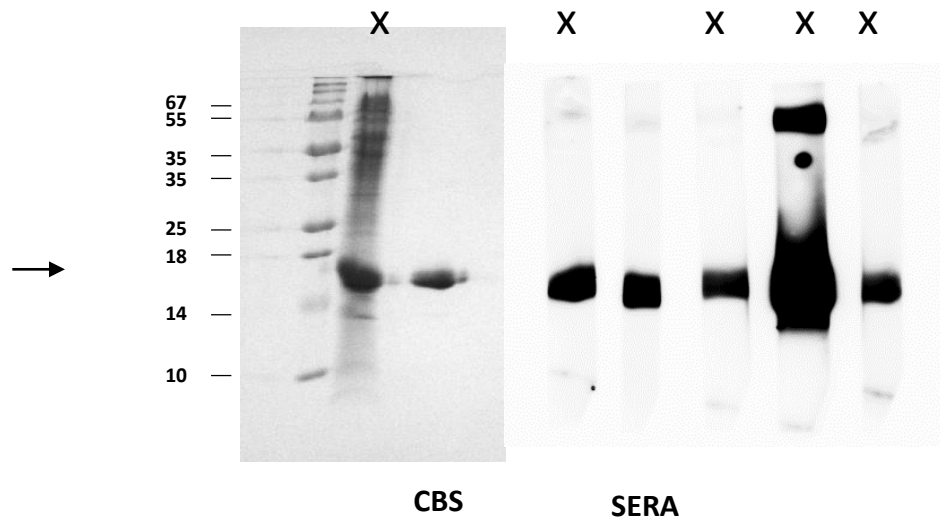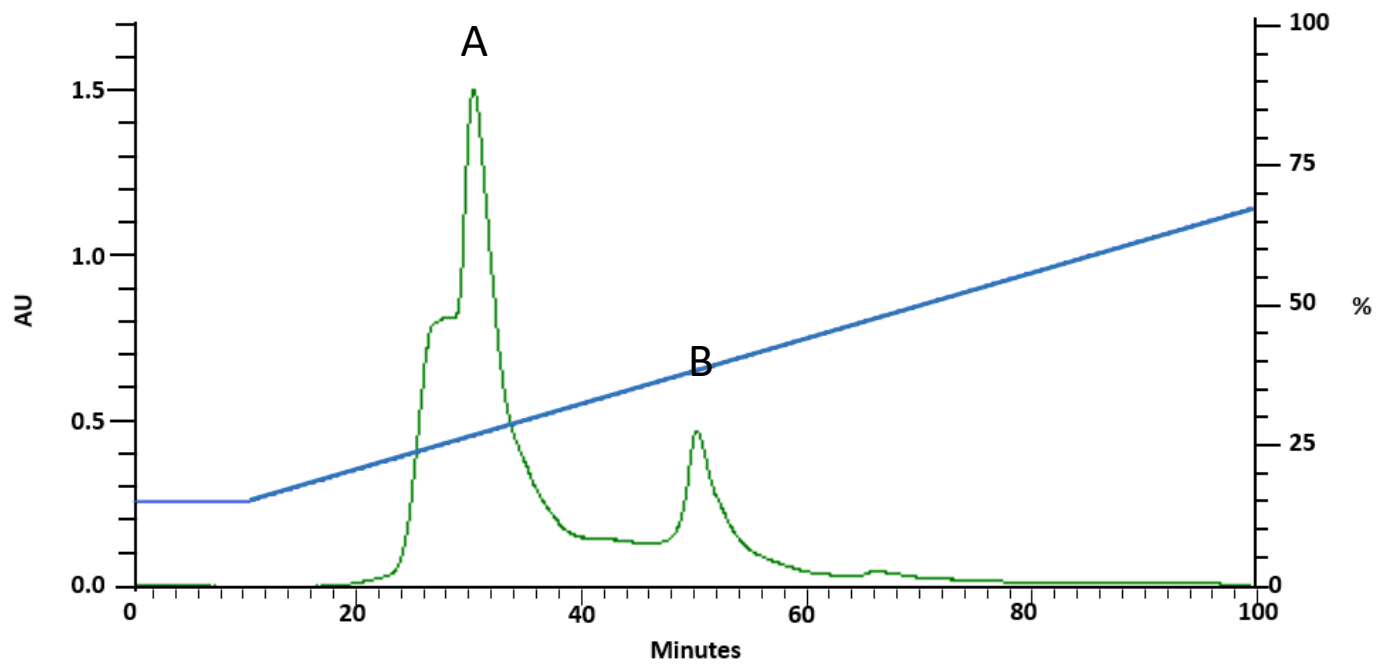

**Figure 3.**

# Skin prick test (SPT) + to Peach tree pollen

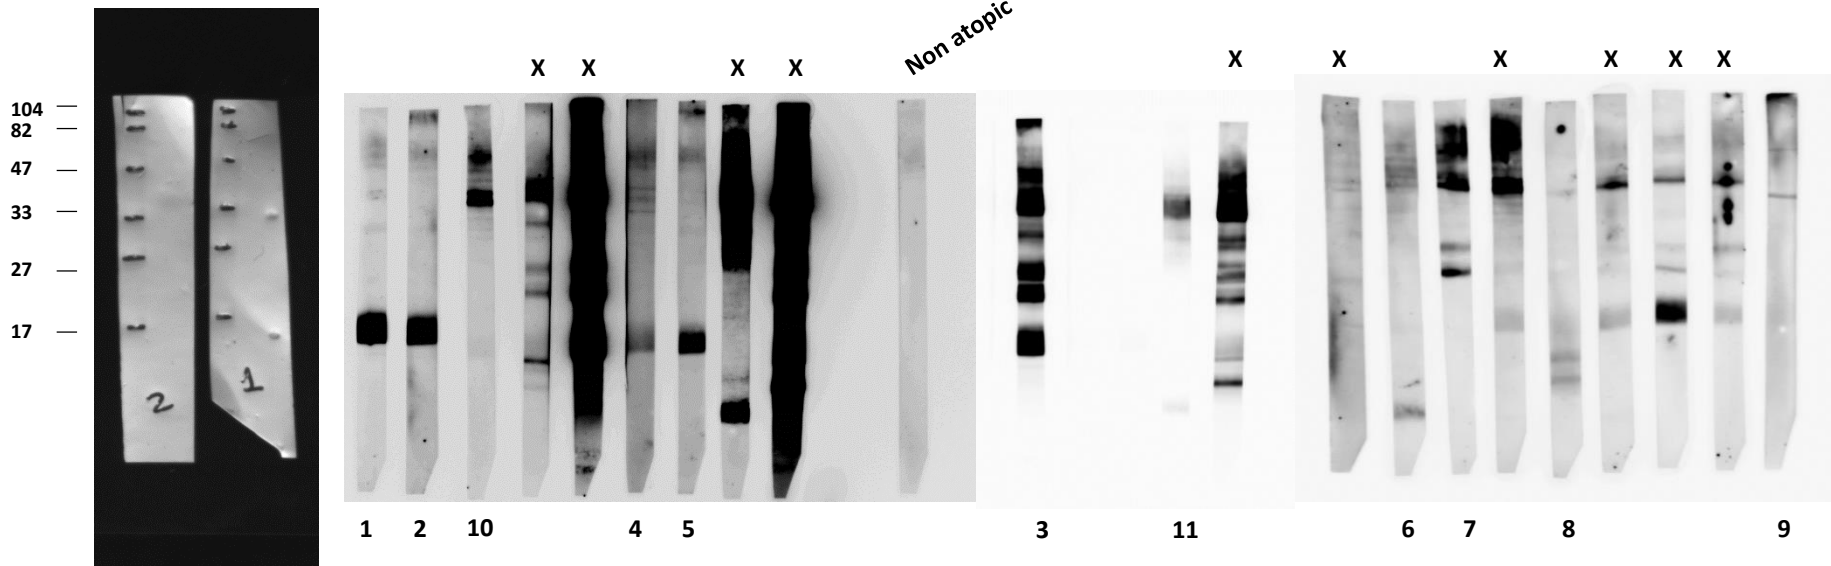

Figure 4.
